# Supplementary material for: Identification and Validation of RELN Mutation as a Response Indicator for Immune Checkpoint Inhibitor Therapy in Melanoma and Non-Small Cell Lung Cancer
Source: MDPI journal article supplement (doi:10.3390/cells11233841), 2022-11-30
Supplement: s1 [file s1]

## Supplementary Figures

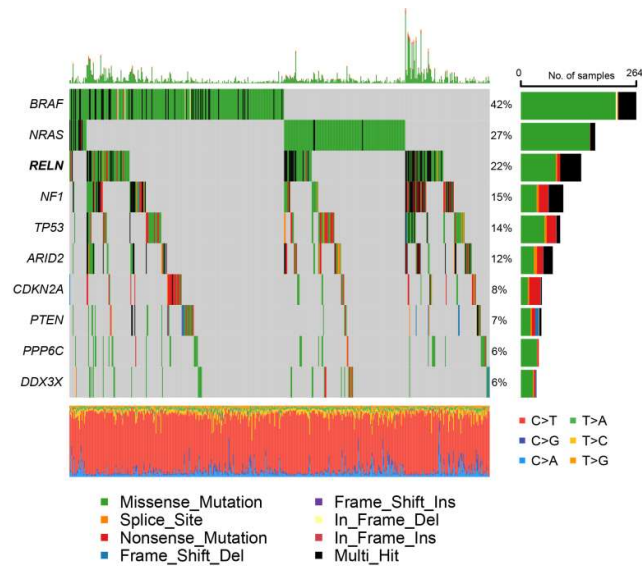

**Figure S1.** Mutational patterns of *RELN* and common melanoma driver genes exhibited with waterfall plot.

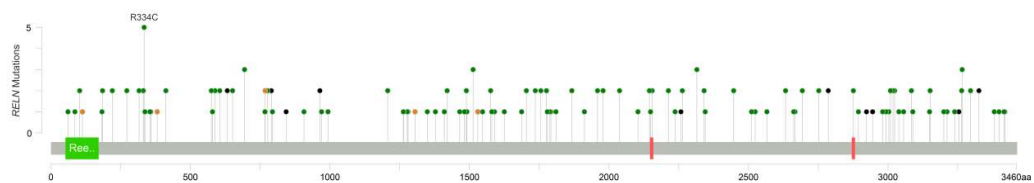

**Figure S2.** Detailed amino acid changes induced by *RELN* mutations in the integrated melanoma cohort.

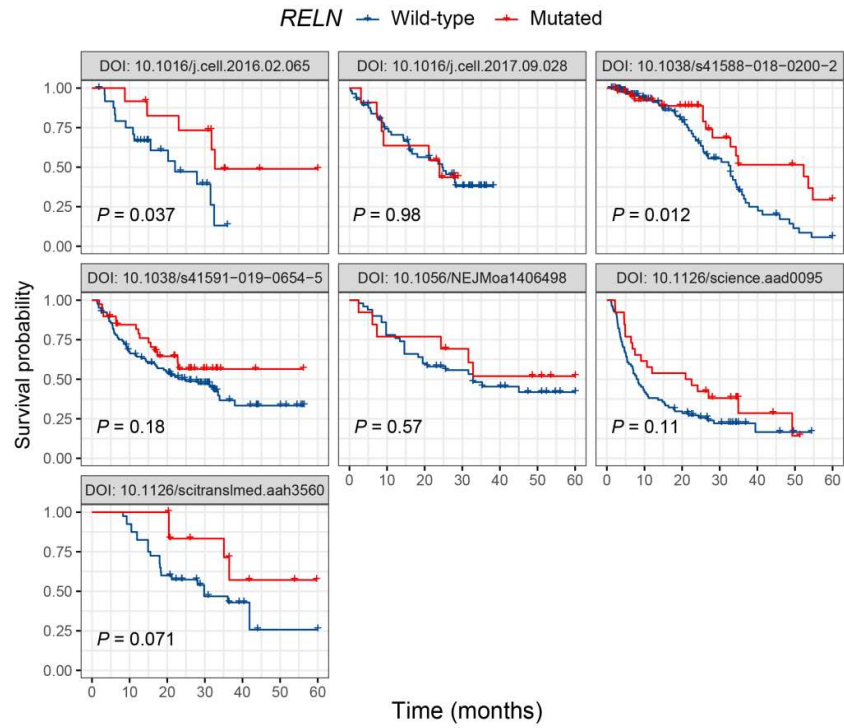

**Figure S3.** Kaplan-Meier survival analyses of *RELN* mutations in individual ICI-treated melanoma cohorts.

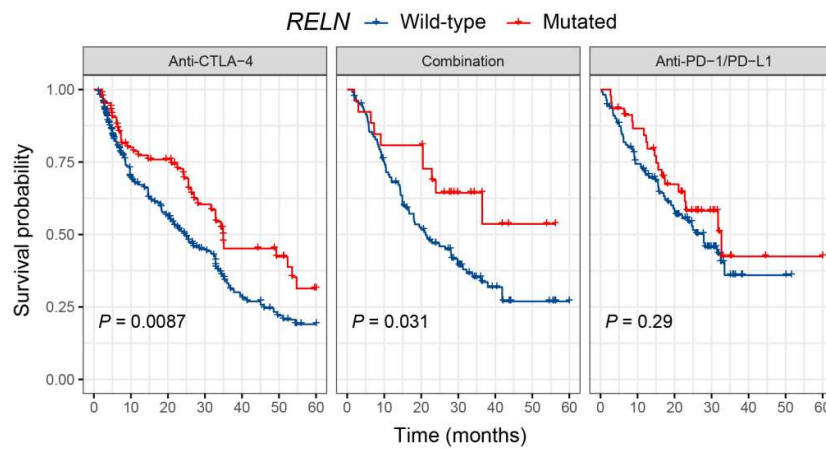

**Figure S4.** Kaplan-Meier survival analyses of *RELN* mutations in distinct ICI treatment types in melanoma.

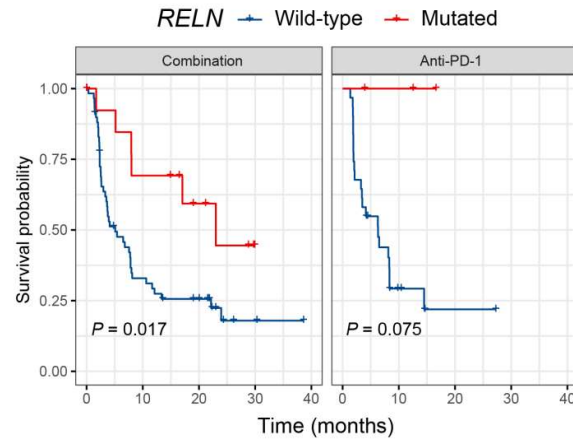

**Figure S5.** Kaplan-Meier survival analyses of *RELN* mutations in individual ICI-treated NSCLC cohorts.

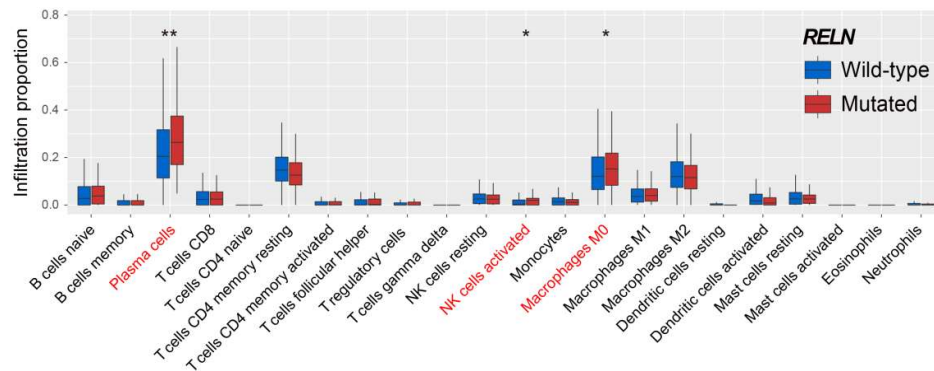

**Figure S6.** Distinct infiltration of 22 immunocytes of *RELN* mutated and wild-type groups evaluated with CIBERSORT algorithm in NSCLC. Immunocytes highlighted with red are significantly differentially infiltrated.

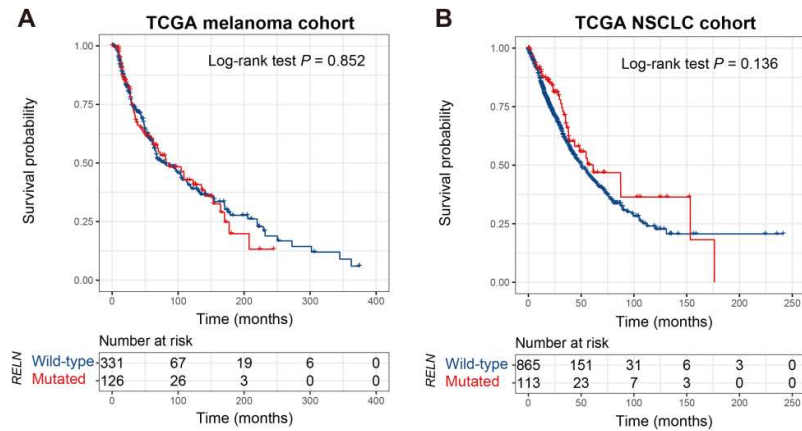

**Figure S7.** Prognostic capacities of *RELN* mutations in (A) melanoma and (B) NSCLC patients derived from the TCGA project.

| Variable              | N   | Hazard ratio      | P     |
|-----------------------|-----|-------------------|-------|
| <b>Age</b>            |     |                   |       |
| > 60                  | 184 | Reference         |       |
| ≤ 60                  | 178 | 1.07 (0.80, 1.45) | 0.642 |
| Unknown               | 264 | 1.07 (0.77, 1.50) | 0.676 |
| <b>Sex</b>            |     |                   |       |
| Female                | 199 | Reference         |       |
| Male                  | 359 | 0.90 (0.70, 1.15) | 0.386 |
| Unknown               | 68  | 1.16 (0.77, 1.74) | 0.489 |
| <b>Stage</b>          |     |                   |       |
| M0                    | 25  | Reference         |       |
| M1a                   | 37  | 1.58 (0.65, 3.84) | 0.318 |
| M1b                   | 58  | 2.07 (0.91, 4.70) | 0.083 |
| M1c                   | 289 | 3.03 (1.42, 6.48) | 0.004 |
| Unknown               | 217 | 1.60 (0.74, 3.47) | 0.233 |
| <b>Therapy target</b> |     |                   |       |
| CTLA-4                | 324 | Reference         |       |
| Combination           | 144 | 0.84 (0.61, 1.15) | 0.273 |
| PD-1/PD-L1            | 158 | 0.76 (0.55, 1.07) | 0.114 |
| <b>FAT1</b>           |     |                   |       |
| Wild-type             | 545 | Reference         |       |
| Mutated               | 81  | 0.69 (0.52, 1.02) | 0.037 |
| <b>BRCA1/2</b>        |     |                   |       |
| Wild-type             | 553 | Reference         |       |
| Mutated               | 73  | 1.02 (0.69, 1.49) | 0.926 |
| <b>TP53</b>           |     |                   |       |
| Wild-type             | 535 | Reference         |       |
| Mutated               | 91  | 1.33 (0.97, 1.84) | 0.079 |
| <b>POLE</b>           |     |                   |       |
| Wild-type             | 595 | Reference         |       |
| Mutated               | 31  | 0.56 (0.29, 1.05) | 0.072 |
| <b>RELN</b>           |     |                   |       |
| Wild-type             | 467 | Reference         |       |
| Mutated               | 159 | 0.72 (0.54, 0.96) | 0.026 |

**Figure S8.** Multivariable Cox regression analysis of *RELN* mutations was performed with multiple clinical confounding factors taken into consideration in melanoma.

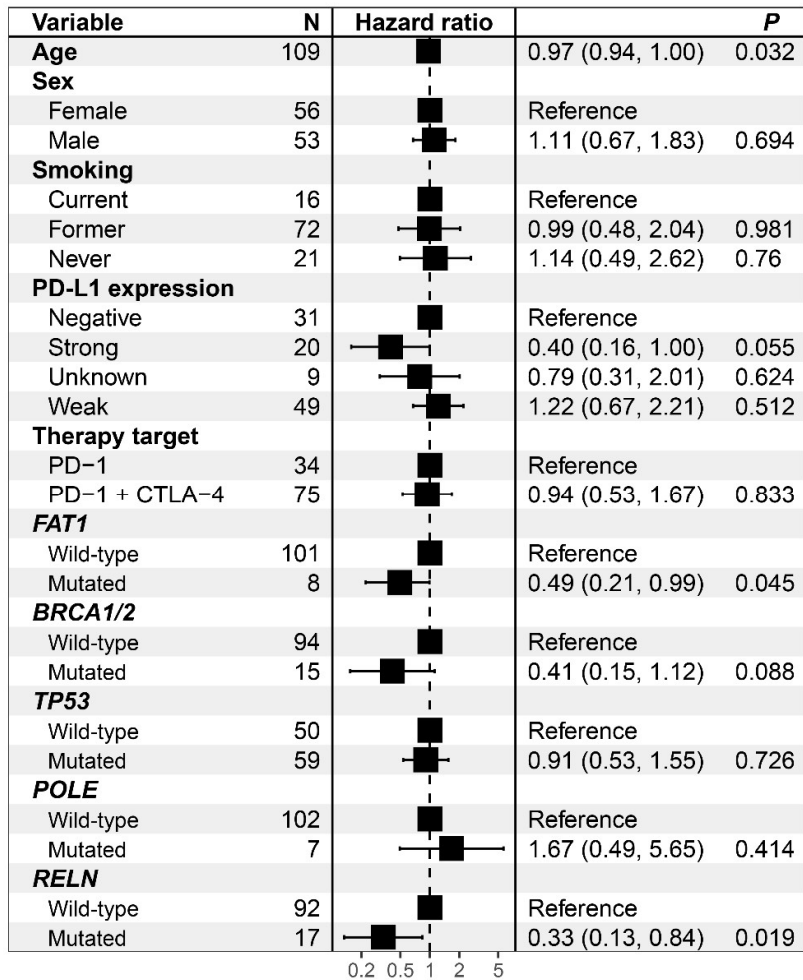

**Figure S9.** Multivariable Cox regression analysis of *RELN* mutations was performed with multiple clinical confounding factors taken into consideration in NSCLC.
